# Supplementary material for: A combinatorial approach toward fabrication of surface-adsorbed metal nanoparticles for investigation of an enzyme reaction
Source: Royal Society of Chemistry journal article supplement (doi:10.1039/b924233n), 2010-01-01
Supplement: b924233n.pdf [file b924233n.pdf]

Supplementary data for 'A combinatorial approach toward fabrication of surface-adsorbed metal nanoparticles for investigation of an enzyme reaction'

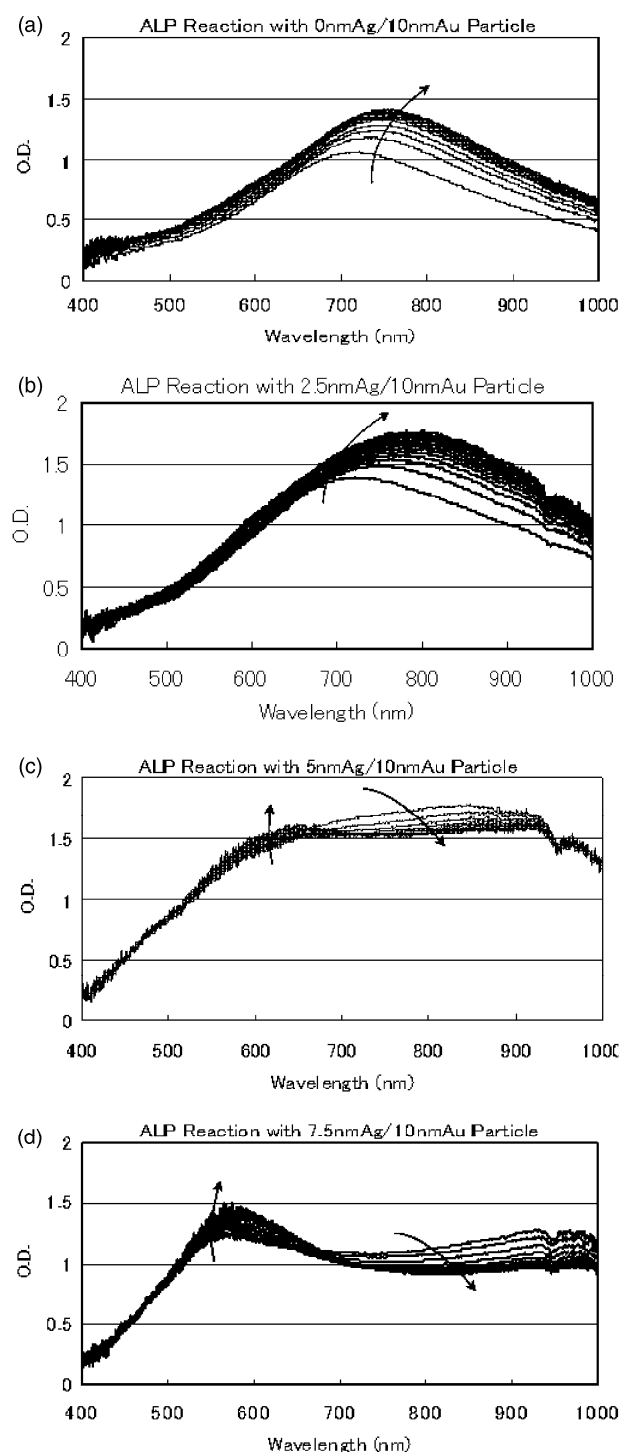

**Figure S1.** Initial assessment of the combinatorial approach. Some of the combinatorial spheres are evaluated in connection with the ALP reaction.

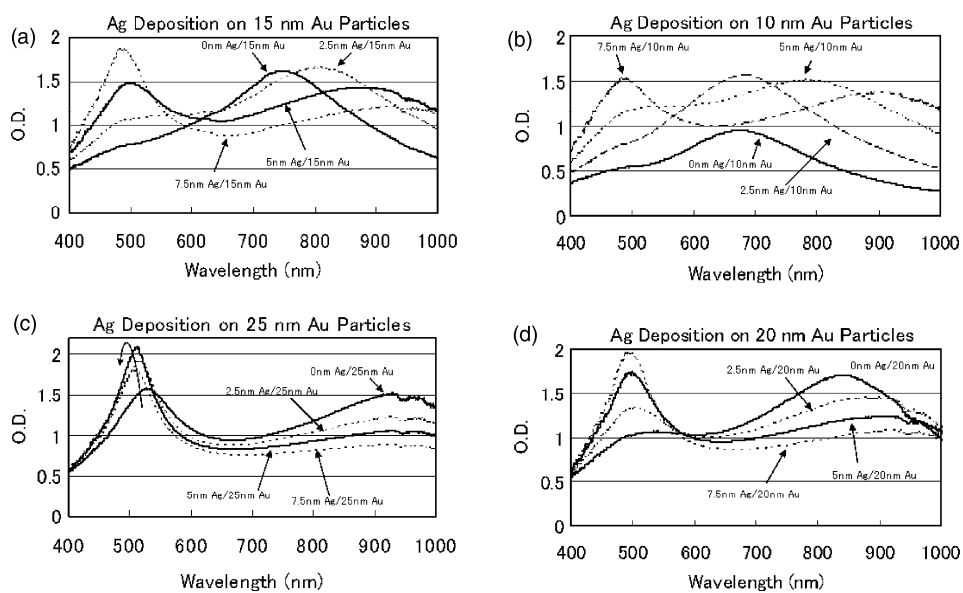

**Figure S2.** Spectra of most spots for the combinatorial particle array shown in Fig. 12. With thinner gold deposition thicknesses, even a very thin silver deposition has a large effect in the resulting spectrum.
